# Supplementary material
Source: PubMed Central journal article supplement (PMC3546231)
Supplement: NIHMS405095-supplement-01.pdf [file NIHMS405095-supplement-01.pdf]

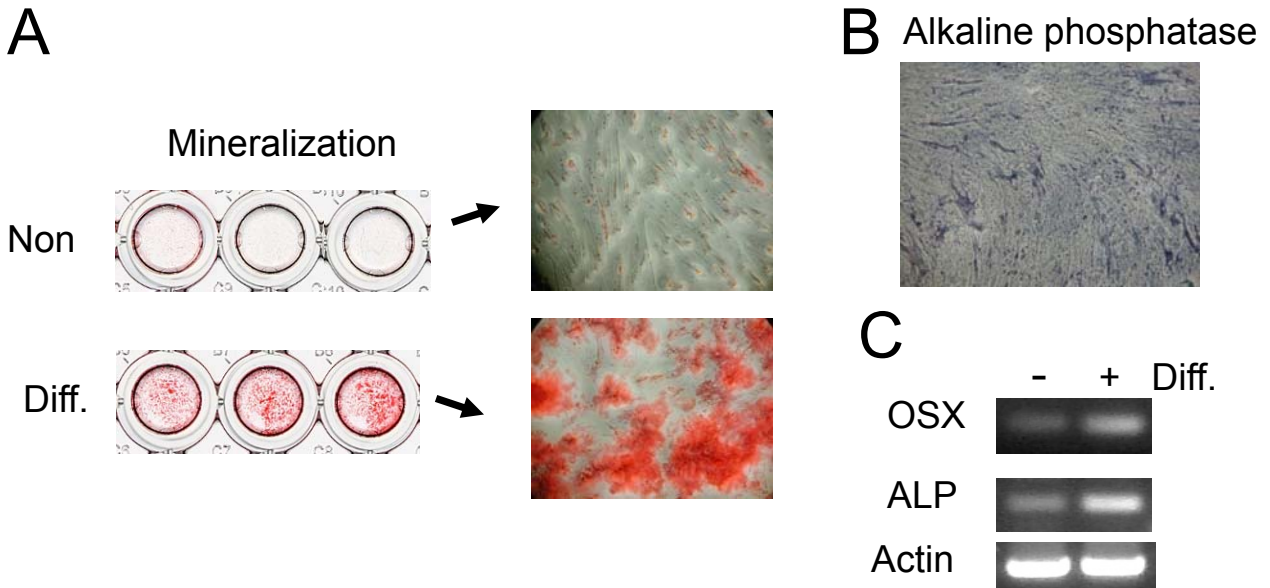

**Supplemental Figure 1: Differentiation of hBMSCs to osteoblasts.**

**(A)** hBMSCs were treated with osteoblast differentiation medium or  $\alpha$ MEM (non-diff.) for 14 days and stained for mineralization with Alizarin red S (10x). **(B)** hBMSCs were differentiated for 7 days and stained for alkaline phosphatase. **(C)** RNA was isolated from control and differentiated cells and analyzed by RT-PCR for Osterix (OSX), alkaline phosphatase (ALP), and Actin (loading control).

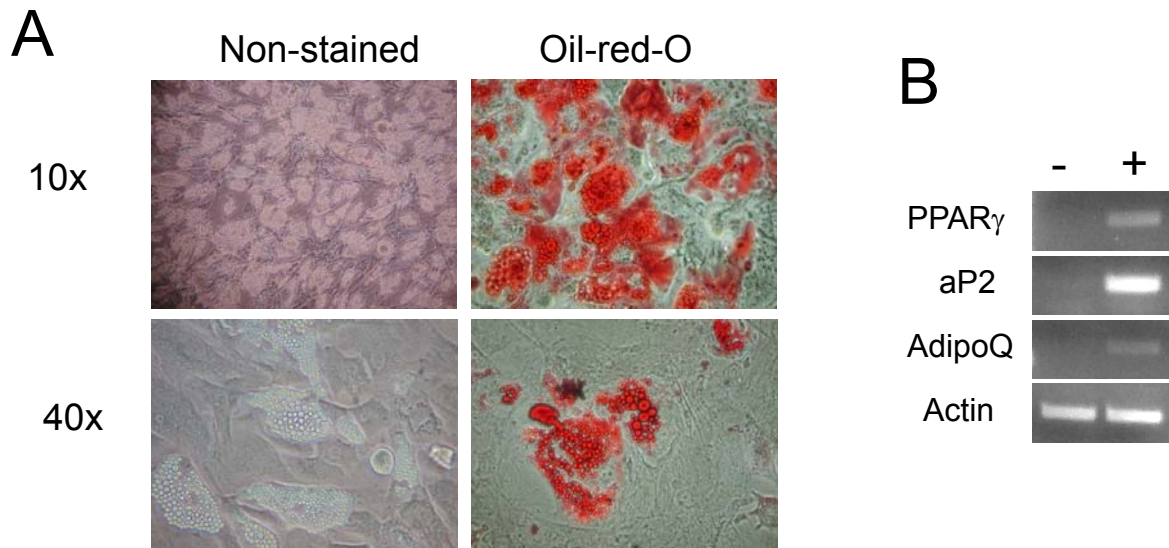

**Supplemental Figure 2: Differentiation of hBMSCs to adipocytes. (A)** hBMSCs at confluency were treated with differentiation medium for 7 days and photographed under light microscopy. Lipid accumulation is clearly visible. (10x and 40X). Bottom panels; Cells were then stained with Oil-red-O to confirm lipid accumulation (10x and 40X). **(B)** Adipocytes were generated as in (A) and gene expression analyzed by RT-PCR for PPAR $\gamma$ , aP2, adiponectin (*AdipoQ*) and actin. (Rep. of 3 patients).

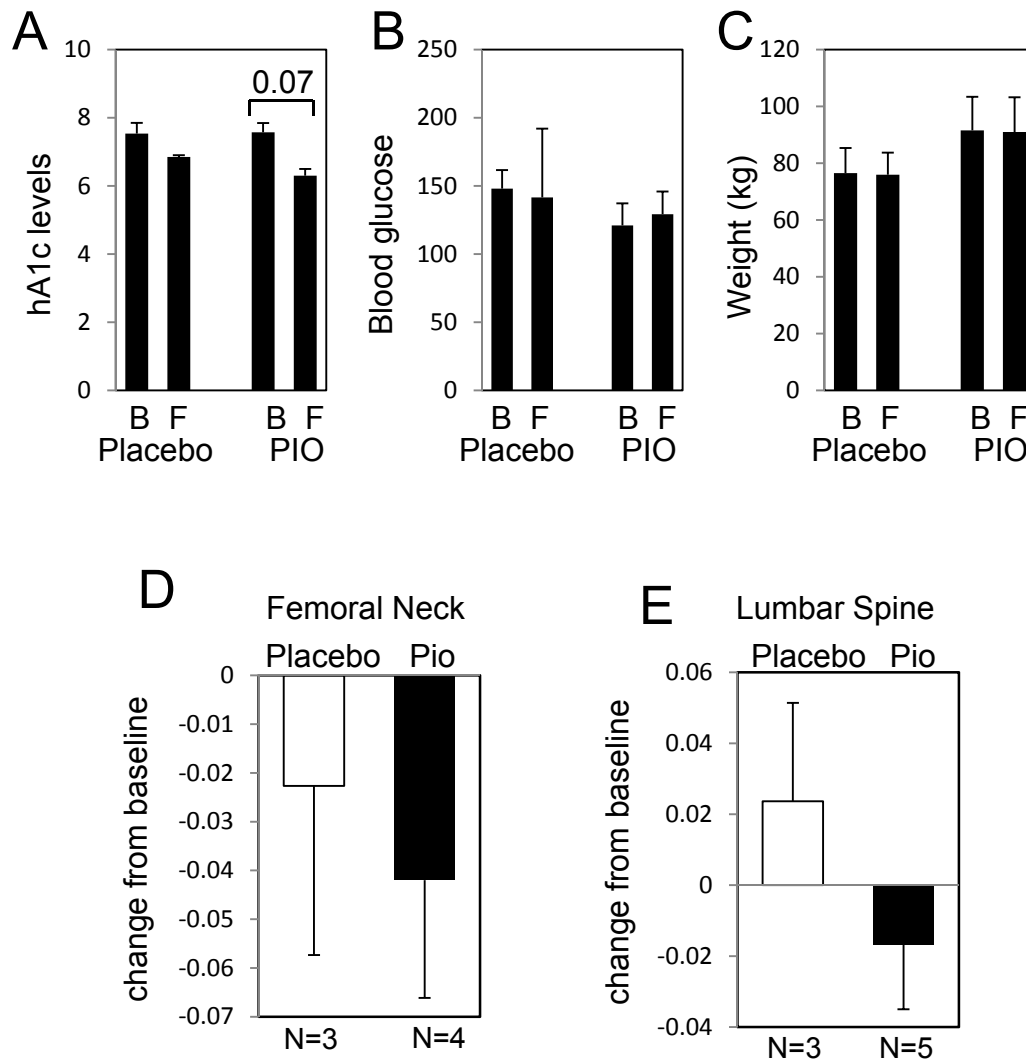

**Supplemental Figure 3: Baseline and final response of study subjects treated with Pioglitazone or placebo.** Pre-diabetic volunteers had (B:baseline) blood, weight, and BMD measurements taken (by DeXA) and the same parameters measured (F:final) after 26 weeks of placebo (N=3) or PIO (N=5). Blood hA1C (**A**) and glucose (**B**) were measured as well as weight (**C**). BMD was measured by DEXA at Femoral Neck (**D**) and Lumbar Spine (L1-4) (**E**) and results are expressed as the mean +/- SEM change from baseline for each patient. Changes were not statistically different.

### Supplemental Table 1: Bone metabolism markers

| Plasma  | N | Osc  | +/-  | CTX  | +/-  | Adiponectin | +/-  |
|---------|---|------|------|------|------|-------------|------|
| Placebo | 3 | -5.2 | 5.8  | -0.9 | 12.4 | -0.8        | 13.9 |
| Actos   | 4 | -1.0 | 11.7 | -8.4 | 15.7 | 48.3        | 42.5 |

Values are calculated as change from baseline for each patient and are expressed as mean +/-SEM for each group.

### Supplemental Table 2: Primers used for qRT-PCR

| Gene            | Forward                     | Reverse                      |
|-----------------|-----------------------------|------------------------------|
| 18s             | 5'-CAGCCACCCGAGATTGAGCA-3'  | 5'-TAGTAGCGACGGGCGGTGTG-3'   |
| PPAR $\gamma$ 2 | 5'-CCAGAAAGCGATTCCTTAC-3'   | 5'-CGGAGCTGATCCCAAAGTT-3'    |
| aP2/Fabp4       | 5'-TGGAAACTTGTCTCCAGTGAA-3' | 5'-TGATGATCATGTTAGGTTTGGC-3' |
| AdipoQ          | 5'-CCATCTCCTCCTCACTTCCA-3'  | 5'-TAGAACAGCTCCCAGCAACA-3'   |
| RUNX2/Cbfa1     | 5'-CAGTAGATGGACCTCGGGAA-3'  | 5'-CCTAAATCACTGAGGCGGTC-3'   |
| Osc             | 5'-TGAGAGCCCTCACACTCCTC-3'  | 5'-CCTCCTGCTTGGACACAAAG-3'   |
